# Supplementary material for: Hematological parameters of type 2 diabetic adult patients at Debre Berhan Referral Hospital, Northeast Ethiopia: A comparative cross-sectional study
Source: PLoS One. 2021 Jun 14;16(6):e0253286. doi: 10.1371/journal.pone.0253286 (PMC8202906; doi:10.1371/journal.pone.0253286)
Supplement: S3 File — (XLSX) [file pone.0253286.s003.xlsx]

## Sheet: hematological parameters of T2D
IDN	AGE	GEN	EDU	RESI	OCP	INC	WT	HT	WC	HC	SBP	DBP	ANTIDMDR	DUT	DUDM	FBGM1	FBGM2	FBGM3	Glycemia	DMS	EXC	GRLEFY	FGRLEFY	EGC	FEGCON	METC	FMEAT	MILKC	FMILK	TEAC	WBC	NEUT	LYMPH	MON	EOS	BAS	RBC	HGB	HCT	MCV	MCH	MCHC	RDW	PLT	MPV	BMI	WHR	Glycat	PLTcat
10	28	1	4	1	2	2000	50	1.5	82	90	130	90	1	6	6	150	142	113	135	1	2	1	999	2	2	2	1	1	999	2	5.1	4	1.4	1	0.2	0	5.23	16.6	46.9	89.7	31.7	35.3	13.2	190	8.6	22.2222	0.851064	1	0
16	40	1	2	2	4	2500	60	1.4	79	93	130	80	2	6	6	125	140	150	138.333	1	2	2	2	2	1	2	2	2	2	2	7.2	5	1.4	0.6	0.1	0.1	5.12	15.6	45.5	88.9	30.4	34.3	14.1	253	9.9	30.6122	0.851064	1	0
26	50	1	1	2	3	2800	55	1.5	71	81	120	80	1	3	3	140	150	201	163.667	1	2	2	1	2	2	2	2	2	3	2	5.1	4.3	1.3	0.7	0	0.1	4.31	15.2	42.7	99.2	35.4	35.7	13.6	329	8	24.4444	0.867347	1	0
27	24	1	2	2	3	2000	56	1.4	76	86	110	70	1	4	4	200	182	197	193	1	1	2	2	1	999	2	1	2	2	2	5.7	4.2	0.7	0.7	0.1	0	5.47	17	49.4	90.4	31.2	34.5	14	220	8.9	28.5714	0.869048	1	0
30	32	1	4	1	1	4500	66	1.65	88	98	110	70	1	5	5	150	172	148	156.667	1	2	2	3	2	2	1	999	1	999	1	8.5	6.3	1.5	0.6	0.1	0	4.78	15.6	44.7	93.6	32.7	35	12.3	252	8.3	24.2424	0.897959	1	0
31	34	1	3	2	3	3000	68	1.5	80	94	120	80	1	4	4	140	132	122	131.333	1	2	2	2	1	999	1	999	2	2	2	5.7	4.1	1.2	0.3	0	0	5.53	16.9	49.8	90.1	30.6	34	13.9	216	9	30.2222	0.895833	2	0
32	48	1	3	2	3	2500	50	1.4	68	76	130	88	1	3	3	130	120	152	134	1	2	2	1	1	999	1	999	1	999	1	8.9	4.5	3.1	0.9	0.4	0.1	4.9	15.5	44.1	90	31.6	35.1	13.9	230	9.6	25.5102	0.897436	2	0
34	46	1	4	1	3	3000	58	1.4	68	78	110	70	1	3	3	190	181	157	176	1	2	2	2	1	999	1	999	1	999	1	8.4	5.4	2.1	0.5	0.4	0	4.97	15.4	44.8	90.1	30.9	34.3	14	364	8.3	29.5918	0.914634	2	0
35	55	1	2	2	4	2500	62	1.5	84	98	110	88	1	4	4	170	150	164	161.333	1	2	2	1	1	999	2	2	1	999	1	8.5	4.7	2.7	0.6	0.4	0.1	4.67	15	44	94.4	32.2	34.1	13	234	7.3	27.5556	0.883721	2	0
36	40	1	3	2	3	2500	55	1.6	68	80	110	70	1	6	6	140	128	135	134.333	1	2	2	1	2	1	2	1	1	999	2	7.8	5.6	0.8	1	0.1	0	5.8	17.1	49.8	85.9	29.6	34.4	13.1	265	8.4	21.4844	0.862069	1	0
39	40	1	4	1	1	3500	62	1.7	70	81	130	85	1	3	3	190	170	180	180	1	2	2	2	2	1	2	2	2	1	1	6.2	2.8	2.4	0.6	0.4	0	4.85	17.3	49	101.1	34	35.3	14.7	181	9	21.4533	0.88764	2	0
40	28	1	4	1	1	3800	60	1.6	77	89	120	80	1	3	3	120	110	128	119.333	1	2	2	2	1	999	2	1	1	999	2	8.3	5.2	2.1	0.6	0.4	0.1	4.94	15.3	44.5	90.1	31	34.4	14.4	350	8.2	23.4375	0.908163	2	0
42	32	1	3	1	1	2000	68	1.6	88	97	110	70	1	4	4	152	140	182	158	1	2	2	2	1	999	1	999	1	999	1	8	6.3	1.2	0.4	0.1	0	4.82	16.7	47.8	99	34.5	34.9	15.8	181	9.2	26.5625	0.851064	1	0
47	38	1	4	1	4	5700	59	1.4	73	84	140	90	1	6	6	140	120	124	128	1	2	2	1	1	999	1	999	1	999	2	7.9	6.2	1.2	0.3	0.1	0	4.79	16.6	47.6	99.3	34.7	34.9	15.8	177	9.2	30.102	0.903614	2	0
50	28	1	3	2	4	800	60	1.4	89	98	110	70	1	3	3	110	120	154	128	1	2	2	2	1	999	1	999	2	2	2	7.1	4.7	1.2	0.8	0.3	0.1	5.13	16.1	46.8	91.3	31.3	34.3	14.2	185	10.2	30.6122	0.898734	1	0
53	50	1	2	1	3	1500	70	1.5	86	96	130	90	1	3	3	251	152	203	202	1	1	2	1	2	1	2	1	2	1	2	7.4	3.4	2.6	0.9	0.3	0.1	5.25	16.6	48.1	91.5	31.6	34.5	15.2	291	6.9	31.1111	0.869048	2	0
57	32	1	2	1	4	1500	68	1.5	74	80	110	70	1	4	4	189	104	125	139.333	1	2	2	1	2	1	2	1	1	999	2	10.4	6.8	2.1	1.1	0.3	0.1	5.2	15.8	47.4	91.1	30.9	33.3	14.4	217	9.7	30.2222	0.887755	2	0
63	40	1	3	1	3	3000	62	1.55	75	87	130	80	1	4	4	134	130	169	144.333	1	1	2	1	2	1	1	999	2	2	2	7.1	4.4	2	0.4	0.2	0.1	5.2	16.2	46.5	89.1	31.1	34.9	15.5	233	7.5	25.8065	0.894737	1	0
70	43	1	4	1	1	5960	85	1.7	89	98	120	80	1	5	5	135	165	160	153.333	1	2	2	2	2	1	2	1	1	999	1	5	1.65	2.8	0.5	0.3	0	4.92	17.4	43.8	89	35.4	36.1	13.2	203	8.4	29.4118	0.865169	2	0
81	43	1	4	1	3	5000	65	1.65	76	89	125	78	1	1	1	140	120	139	133	1	1	2	2	2	1	1	999	2	2	1	6.9	3.9	2.1	0.6	0.3	0	5.29	16	44.4	83.8	30.2	36	13.1	179	8.8	23.8751	0.918605	2	0
89	36	1	4	1	4	2500	70	1.6	83	94	125	75	1	2	2	192	160	170	174	1	1	1	999	2	1	1	999	1	999	2	7	3.2	3.1	0.4	0.3	0	5.51	16.5	47.9	86.9	29.9	34.3	14.1	254	7.4	27.3437	0.909091	2	0
92	56	1	1	1	3	800	62	1.78	75	83	130	80	1	1	1	210	120	194	174.667	1	1	2	1	1	999	1	999	1	999	2	9.5	6	2.5	0.5	0.3	0.1	5.99	17.6	50	83.5	29.5	35.3	13.5	271	8.2	19.5682	0.911392	1	0
93	33	1	4	1	4	580	54	1.6	76	85	115	70	1	2	2	180	116	222	172.667	1	1	2	2	2	2	2	1	2	3	2	8.4	6.4	1.3	0.5	0.2	0	5.51	17	49.3	89.6	30.9	34.5	13.3	246	7.1	21.0937	0.863158	1	0
100	38	1	4	1	1	1400	70	1.6	80	91	132	84	2	5	5	140	120	118	126	1	1	2	2	2	2	2	1	2	3	2	8.46	4.48	3.2	0.34	0.31	0.11	5.18	15.1	44.3	85.4	29.1	34.1	15.9	282	6	27.3437	0.863158	1	0
102	29	1	2	1	2	3000	58	1.68	71	79	100	65	2	4	4	120	135	140	131.667	1	1	2	1	2	1	2	2	2	1	2	4.7	1.6	1.9	0.4	0.5	0	5.16	15.6	47.8	85.2	28.3	33.2	14.3	226	7.5	20.5499	0.896907	1	0
106	30	1	3	1	4	1700	58	1.6	76	85	114	72	1	1	1	120	130	115	121.667	1	2	2	1	2	1	2	1	1	999	2	10.2	4.75	2.5	0.3	0.1	0.1	5.1	16	51	100	31	34.2	13.4	334	8.5	18.75	0.865169	2	0
107	32	1	3	1	4	2500	65	1.65	88	98	108	68	1	2	2	160	120	155	145	1	2	2	1	1	999	2	1	1	999	2	8.3	4.2	2.7	0.8	0.5	0	5.42	15.9	47.9	91.8	29.5	33.2	13.7	328	8.7	23.8751	0.861702	1	0
111	43	1	1	1	4	3700	48	1.6	78	87	128	75	1	4	4	140	180	218	179.333	1	1	2	2	2	1	2	1	2	1	2	4.7	1.6	1.9	0.4	0.5	0	5.61	15.9	47.8	85.2	28.3	33.2	14.3	226	7.5	18.75	0.851852	2	0
113	58	1	3	1	4	2800	70	1.75	87	98	127	78	1	6	6	140	128	188	152	1	2	1	999	1	999	1	999	1	999	2	5.9	3.2	1.8	0.7	0.1	0	5.4	16.5	52.4	97.3	31.7	33.9	14.3	195	8.3	22.8571	0.894737	2	0
116	41	1	4	1	3	1500	50	1.5	69	79	124	70	1	2	2	140	128	129	132.333	1	2	2	1	2	1	1	999	1	999	2	3.6	2	1.1	0.5	0	0	5.92	17.8	50	89.8	30.1	33.5	14.1	220	9.7	22.2222	0.884615	1	0
117	30	1	2	1	4	1400	60	1.4	80	95	120	80	1	1	1	109	124	153	128.667	1	2	2	2	2	2	2	1	2	3	2	3.7	1.6	1.3	0.4	0.3	0.1	5.38	16.9	50.3	93.5	31.4	33.6	12.1	271	6.9	30.6122	0.88764	2	0
121	40	1	4	1	4	1500	70	1.5	82	94	140	80	1	2	2	149	125	150	141.333	1	2	2	1	2	1	1	999	2	1	2	5.7	1.7	2.7	0.4	0.6	0	5.86	16.2	48.6	94.6	27.6	33.3	13.2	293	7.4	31.1111	0.880435	1	0
125	61	1	4	1	4	2438	68	1.6	80	90	138	78	1	1	1	128	140	152	140	1	2	2	1	1	999	2	1	1	999	2	6.1	3.6	1.5	0.6	0.4	0	5.84	16.8	50.4	91.1	31.6	34.7	14	160	9.2	26.5625	0.914894	2	0
129	32	1	1	1	4	3200	54	1.5	78	84	110	70	1	5	5	208	192	204	201.333	1	1	2	2	2	1	2	1	2	1	1	5.5	2.1	2.2	0.4	0.6	0.1	5.19	15.5	46.4	89.4	29.8	33.3	13.1	201	8.2	24	0.8875	2	0
132	60	1	4	1	1	8000	74	1.75	84	96	130	90	1	3	3	148	126	136	136.667	1	1	2	2	1	999	1	999	2	2	1	6.3	3.6	2	0.6	0.1	0	4.86	15.9	48.4	98.5	32.1	32.8	15.3	249	8.5	24.1633	0.89899	2	0
134	38	1	3	1	4	3700	52	1.5	77	87	120	80	2	1	1	120	142	126	129.333	1	1	2	1	1	999	1	999	2	2	1	7.7	3.3	3.7	0.6	0.1	0	5.87	17	51	86.9	28.9	33.2	13.7	195	9.2	23.1111	0.858586	2	0
4	28	2	2	1	3	1500	45	1.5	74	88	120	80	1	5	5	126	200	202	176	1	2	1	999	1	999	2	1	1	999	1	7.5	4.5	2.3	0.5	0.1	0	5.28	15.8	46.8	88.6	29.9	33.7	13.2	288	11.2	20	0.884615	2	0
24	50	2	3	2	4	1800	56	1.5	71	80	110	70	1	4	4	200	180	220	200	1	2	2	1	2	1	2	1	2	1	1	7.3	3.8	2.5	0.7	0.3	0.1	4.64	14.9	43.6	94	32.1	34.2	14.2	289	8.4	24.8889	0.907216	2	0
28	45	2	4	1	3	2500	70	1.6	89	99	120	80	1	6	6	190	150	207	182.333	1	2	2	2	2	1	2	1	1	999	1	8.5	6	1.8	0.6	0.1	0	4.66	15.2	43.5	93.3	32.6	35	15.1	291	8.7	27.3437	0.860465	2	0
58	32	2	4	1	4	800	45	1.5	68	76	120	80	1	4	4	140	128	160	142.667	1	2	2	1	2	2	2	1	2	2	2	6.6	2.8	2.8	0.7	0.3	0.1	5.27	17.1	49.7	94.4	32.6	34.5	14.5	323	7.9	20	0.873418	1	0
59	41	2	4	1	3	2400	58	1.5	75	80	130	80	1	3	3	190	180	214	194.667	1	1	2	1	2	1	2	1	2	1	2	7.8	3.8	2.6	0.9	0.3	0.1	4.61	15.2	43.3	94	33	35.1	13.1	213	9.7	25.7778	0.842105	1	0
82	40	2	3	1	4	800	73	1.55	80	94	115	70	1	5	5	140	128	126	131.333	1	2	2	1	1	999	1	999	2	2	1	6.9	4.2	1.8	0.7	0.1	0	5.32	16.6	47.3	88.9	31.2	35.1	13.2	200	9.4	30.385	0.888889	2	0
88	56	2	4	1	1	7800	55	1.65	74	86	110	75	1	2	2	129	142	169	146.667	1	2	2	2	1	999	2	1	1	999	2	6.1	3.4	2.1	0.4	0.1	0	4.93	15.2	43.6	88.5	30.9	35	13.3	331	6	20.202	0.9375	2	0
95	35	2	4	1	2	3400	64	1.7	87	98	130	78	1	2	2	147	190	202	179.667	1	1	2	1	1	999	1	999	2	1	2	6.4	3.3	2	0.9	0.2	0	5.33	15.8	46.1	86.5	29.7	34.3	13.4	302	8	22.1453	0.876543	2	0
97	42	2	1	1	4	2300	69	1.6	82	95	128	78	2	5	5	124	152	140	138.667	1	2	1	999	1	999	1	999	1	999	1	8.9	5.9	1.5	1	0.1	0	5.56	17.1	49.9	89.8	30.7	34.2	13.7	235	8	26.9531	0.865169	2	0
99	48	2	3	1	3	4500	46	1.55	70	79	138	86	2	6	6	112	110	126	116	1	1	2	1	2	1	1	999	1	999	2	7.96	4.54	2.69	0.28	0.32	0.11	5.11	15.2	44.8	87.6	29.7	33.9	16.2	269	6.1	19.1467	0.887755	2	0
104	48	2	4	1	1	4662	60	1.5	87	97	112	73	1	5	5	140	126	166	144	1	1	2	1	1	999	2	1	2	1	1	8.4	4.3	3.2	0.6	0.2	0	5.41	15.4	46.5	86	28.6	32.2	12.9	364	8.9	26.6667	0.917526	2	0
105	55	2	4	1	1	4670	71	1.55	87	99	135	80	1	1	1	128	170	159	152.333	1	2	1	999	1	999	1	999	1	999	2	7.7	4.4	2.5	0.5	0.3	0.1	5.21	16.3	49.4	94.8	31.3	33	13.3	262	9.3	29.5525	0.907216	2	0
112	58	2	3	1	4	4500	69	1.5	89	97	115	75	1	6	6	129	140	220	163	1	2	2	3	2	1	2	1	2	2	2	7	3.6	2.7	0.6	0.1	0	5.93	16.7	48.8	96.3	32.8	34.1	14.4	226	9.1	30.6667	0.927083	2	1
115	52	2	1	1	4	1500	48	1.6	77	89	124	78	1	5	5	200	148	219	189	1	2	2	2	2	1	2	1	2	2	2	10.1	1.7	1.8	0.1	0.1	0.2	5.35	16.1	47.7	89.1	30.2	33.9	12.6	259	6.9	18.75	0.883117	1	0
122	38	2	4	1	1	2800	58	1.67	81	94	121	85	2	2	2	128	136	145	136.333	1	2	2	1	2	1	2	1	2	1	2	6.7	4.3	1.8	0.6	0.1	0	5.53	15.7	48.5	87.7	28.4	32.4	13.6	340	8.9	20.7967	0.88764	1	0
123	38	2	3	1	4	4200	52	1.55	76	87	128	88	1	2	2	142	128	150	140	1	1	2	1	1	999	2	1	2	2	2	8.2	3.8	3.1	0.7	0.5	0.1	4.89	15.4	47.1	96.3	31.5	32.7	15.1	282	8.5	21.6441	0.897436	2	0
130	53	2	2	1	4	1800	60	1.6	87	98	120	80	1	3	3	142	128	173	147.667	1	1	2	1	2	1	1	999	2	2	2	5.7	2.8	2.4	0.4	0.1	0	5.33	16	47.6	89.2	30.1	33.7	13.4	335	7.3	23.4375	0.857143	2	0
29	44	2	4	1	1	3500	65	1.5	87	98	110	88	1	3	3	140	250	201	197	1	2	2	2	1	999	1	999	1	999	2	5	2.1	2.4	0.3	0.1	0	4.88	14.7	43.6	89.4	30.1	33.6	14.7	268	8.5	28.8889	0.908163	1	0
41	49	2	4	1	1	3500	69	1.7	88	99	110	80	1	5	5	210	180	200	196.667	1	2	2	2	1	999	2	1	1	999	2	7.4	4.5	1.7	1	0.3	0.1	5.25	14.5	47.5	90.4	27.5	34.1	13.7	243	7.7	23.8754	0.870588	2	0
71	45	2	4	2	4	2600	52	1.5	72	79	108	70	1	5	5	124	147	111	127.333	1	1	2	2	1	999	2	2	2	2	2	4.9	1.7	3.2	0.4	0.2	0	4	14.4	39	97.5	33	34	13.5	270	6.9	23.1111	0.891304	2	0
86	30	2	1	1	4	2400	52	1.65	77	89	125	80	1	5	5	200	129	219	182.667	1	1	2	2	2	1	1	999	1	999	2	9	6.5	1.7	0.5	0.6	0	4.89	14.4	41.5	84.8	29.5	34.8	13.7	281	10.1	19.1001	0.886364	2	0
54	36	1	4	1	2	2300	64	1.6	85	95	140	70	1	4	4	120	158	198	158.667	1	2	1	999	1	999	2	1	2	1	2	8.6	7.1	2.4	0.5	0.2	0	4.56	14.2	41.9	91.8	31.1	33.8	13.4	398	7.9	25	0.89011	2	0
75	36	1	4	1	1	3670	62	1.6	75	88	120	78	1	6	6	140	136	182	152.667	1	1	2	1	1	999	2	1	2	2	2	5.9	2.4	2.8	0.4	0.2	0.1	4.9	14.1	42.2	86	28.8	33.5	14	330	8.3	24.2187	0.884615	2	0
103	34	1	4	1	4	3200	62	1.6	71	80	109	65	1	6	6	140	92	160	130.667	1	1	2	1	2	2	2	1	2	1	2	8.8	6.3	1.4	0.71	0.1	0.2	4.79	13.7	42.8	89.4	30.1	33.6	16.5	320	6.7	24.2187	0.878788	2	0
118	35	1	3	1	4	1500	70	1.6	86	94	110	75	2	6	6	200	180	200	193.333	1	1	1	999	1	999	1	999	2	1	2	6.2	4.3	1.4	0.4	0.1	0	4.8	14.3	43.2	90.2	29.9	33.1	13.4	317	9.8	27.3437	0.872093	2	0
124	32	1	2	1	3	3200	62	1.67	86	97	128	79	1	4	4	148	128	172	149.333	1	2	2	2	2	2	2	1	2	2	2	6.5	4.5	1.5	0.4	0	0	4.97	14.4	44.6	89.6	29	32.4	13.6	318	9.8	22.231	0.8875	1	0
22	55	2	2	1	4	1000	50	1.5	71	80	130	70	1	6	6	220	190	192	200.667	1	2	2	2	2	1	1	999	2	1	2	10.4	5.8	3	1	0.4	0	4.55	13.8	40.8	89.6	30.2	33.8	14	309	7.6	22.2222	0.864198	2	0
37	39	2	4	1	3	4500	67	1.6	84	98	108	80	1	6	6	144	204	194	180.667	1	1	1	999	1	999	1	999	2	2	2	7.4	5	2	0.3	0	0	4.08	12.2	37.6	92.1	30	32.6	14.8	246	8.6	26.1719	0.905882	2	0
1	53	1	3	1	3	2000	71	1.7	87	98	120	70	1	8	8	131	131	130	130.667	1	2	2	2	2	1	2	1	1	999	1	9.1	5.6	2.7	0.6	0.2	0.1	4.28	15.6	48.6	96.3	33	35.6	13.8	268	8.2	24.5675	0.887755	1	0
2	58	1	4	1	1	2000	65	1.75	78	88	120	80	1	7	7	170	148	126	148	1	2	1	999	1	999	1	999	1	999	2	7	4	2.3	0.6	0.1	0.1	4.89	16.4	46	94	33.5	35.2	13.3	318	7.4	21.2245	0.886364	1	0
3	24	1	3	1	3	2500	52	1.5	78	88	120	80	1	9	9	190	179	195	188	1	2	2	2	1	999	2	2	1	2	2	7.6	4.4	2	0.7	0.4	0	5.2	15.8	48.9	93.6	31.1	34.5	14.3	257	8.2	23.1111	0.886364	2	0
6	28	1	3	1	3	1800	48	1.4	69	78	120	80	1	7	7	207	231	162	200	1	2	2	1	1	999	2	2	1	999	1	5.2	4.6	2.5	0.7	0.4	0	5.1	15.5	47.8	93.7	32.4	35.5	13.7	293	9.1	24.4898	0.911111	1	0
8	50	1	4	1	3	1500	55	1.6	79	86	110	70	1	8	8	160	154	205	173	1	1	2	2	2	2	2	1	1	999	2	4.6	2.5	1	0.9	0.1	0.1	5.19	17.8	47.7	92	34.4	36.2	14	186	7.7	21.4844	0.867347	2	0
11	53	1	4	1	1	4870	90	1.7	83	98	140	90	2	12	12	150	129	200	159.667	1	2	2	3	2	1	2	1	1	999	2	4.4	3.6	2.1	0.9	0.3	0	5.21	16	46.4	90	31	34	13.4	175	8.3	31.1419	0.875	2	0
13	60	1	4	1	1	5000	62	1.75	85	98	130	70	1	11	11	200	190	207	199	1	2	2	2	2	2	2	2	2	1	2	9.5	6	2.5	0.5	0.3	0.1	5.99	17.6	50	83.5	29.5	35.3	13.5	271	8.2	20.2449	0.876543	2	0
17	38	1	3	1	3	3200	68	1.7	80	94	120	80	1	7	7	150	120	142	137.333	1	2	2	2	2	1	1	999	2	2	2	3.9	1.4	1.8	0.4	0.2	0	5.36	16.1	48.3	89.1	30.2	33.8	13.8	237	10.8	23.5294	0.894737	1	0
19	45	1	4	1	1	6582	65	1.5	70	80	110	70	1	8	8	180	156	169	168.333	1	2	2	2	2	1	1	999	1	999	2	5.3	3.9	1.2	1	0.5	0	4.95	16.9	49.1	99.2	34.2	34.5	14.7	263	7.7	28.8889	0.857143	2	0
20	35	1	4	1	3	1000	61	1.7	70	81	110	70	2	10	10	200	190	220	203.333	1	2	2	1	2	2	2	1	2	1	2	6.2	3	2	0.7	0.5	0	5.72	16.9	48	84	29.5	35.1	14.2	301	7	21.1073	0.85	1	0
38	34	1	4	1	3	1800	58	1.5	69	79	110	70	1	8	8	190	158	210	186	1	1	2	2	2	1	2	1	2	1	2	6.3	3.5	1.4	0.8	0.4	0.1	5.81	17	49	84.4	29.2	34.6	13.9	299	7.1	25.7778	0.933333	2	0
43	36	1	4	1	2	4050	71	1.65	85	97	130	80	1	8	8	148	120	136	134.667	1	1	1	999	1	999	1	999	1	999	2	10.6	7.8	2.1	0.5	0.2	0.1	5.14	15.5	45.5	88.5	30.1	34	15.4	326	7.2	26.079	0.863636	1	1
44	37	1	3	1	3	1400	68	1.56	85	98	130	88	1	13	13	160	128	140	142.667	1	2	2	1	1	999	1	999	1	999	2	7.6	4.2	3	0.5	0	0	5.48	17.3	50.6	92.3	31.6	34.2	14.3	263	9	27.9421	0.853933	1	0
49	49	1	4	1	4	500	54	1.45	74	86	130	80	1	9	9	197	176	177	183.333	1	2	1	999	1	999	1	999	1	999	2	9.9	5	2.6	0.6	0.4	0.1	5.37	17.3	49.3	91.7	32.1	35	14.3	415	8.6	25.6837	0.879121	1	0
51	45	1	2	1	4	400	65	1.6	88	98	110	70	1	12	12	120	130	155	135	1	2	2	2	2	2	2	1	2	2	2	10.3	6.9	2	0.6	0.2	0	5.16	15.4	45.7	88.9	29.8	33.7	15.8	354	7.1	25.3906	0.894118	1	0
55	50	1	3	2	4	1000	52	1.5	70	78	140	90	1	7	7	200	190	200	196.667	1	2	2	2	1	999	2	2	2	1	2	7.3	4.8	1.3	0.9	0	0.2	4.78	16.4	47.3	99	34.3	34.6	14.4	286	9.2	23.1111	0.886598	1	0
61	45	1	3	1	4	3000	52	1.6	75	82	110	70	1	7	7	200	138	214	184	1	2	2	1	1	999	1	999	1	999	2	7.9	6.2	1.2	0.3	0.1	0	4.79	16.6	47.6	99.3	34.7	34.9	15.8	177	9.2	20.3125	0.888889	1	0
62	35	1	4	1	1	4900	62	1.5	76	86	130	90	1	7	7	152	142	173	155.667	1	2	2	1	2	1	2	1	1	999	2	7.6	4.1	2.9	0.5	0.1	0	5.41	17.4	49.6	91.7	32.1	35	14.5	247	9	27.5556	0.882353	2	0
66	50	1	3	1	3	4500	63	1.6	77	85	130	90	1	8	8	195	214	216	208.333	1	2	1	999	1	999	1	999	1	999	2	6.8	4.7	1.9	0.6	0.6	0.2	4.55	16.2	41.6	91.5	32.2	36.3	14.1	192	8	24.6094	0.875	1	0
68	50	1	4	1	1	2900	60	1.65	84	90	130	90	1	8	8	180	165	173	172.667	1	2	2	1	1	999	2	2	1	999	1	6.1	3.1	2.1	0.5	0.4	0.1	4.82	17.4	48.8	101.3	34	35.6	14.4	173	8.8	22.0386	0.840909	2	0
69	42	1	4	1	1	4500	66	1.5	79	89	140	84	1	8	8	222	160	214	198.667	1	1	2	1	1	999	2	1	2	1	2	5.7	2.3	2.6	0.6	0.2	0	4.9	16.9	43.9	89.6	34.4	36.1	13.8	206	10	29.3333	0.897959	1	0
72	54	1	2	2	4	2500	68	1.75	74	85	120	80	1	7	7	201	231	160	197.333	1	1	1	999	1	999	2	1	1	999	1	9.7	6.3	2.3	0.7	0.3	0.1	4.97	17.3	43	86.6	34.8	36.4	14.2	302	7.2	22.2041	0.864583	2	0
73	32	1	4	1	2	3700	66	1.55	80	94	110	60	1	7	7	140	130	120	130	1	1	2	2	2	1	2	1	2	2	2	4	1.74	2	0.5	0.2	0	5.1	16.1	45.5	89.1	31.6	35.5	14.5	252	7.5	27.4714	0.852273	2	0
79	60	1	2	2	4	1500	62	1.55	76	88	130	80	1	8	8	140	113	136	129.667	1	1	2	1	2	1	1	999	1	999	2	4.7	2.5	2	0.4	0.3	0.1	5.38	16.1	48	89.1	30	33.6	14	149	11.3	25.8065	0.89899	2	0
90	35	1	4	1	1	8017	52	1.55	70	76	106	64	1	8	8	210	236	189	211.667	1	1	2	2	1	999	2	1	1	999	2	8.9	5.8	1.7	1	0.1	0	5.41	17	48.6	89.8	31.4	35	13.7	232	7.6	21.6441	0.893617	2	0
108	62	1	2	1	4	2000	58	1.7	73	84	125	78	1	12	12	128	148	222	166	1	1	2	3	2	3	2	1	2	3	2	10	5.5	3.3	0.7	0.3	0.1	5.49	17.2	51.5	93.7	31.4	33.5	13.7	303	7.1	20.0692	0.873563	1	0
109	27	1	4	1	3	3700	60	1.65	81	91	108	68	1	8	8	200	150	221	190.333	1	1	2	1	2	1	2	2	2	2	2	6.1	3	2.4	0.5	0.2	0.1	5.35	17	50.2	93.9	31.9	33.9	12.9	239	9	22.0386	0.887755	1	0
110	44	1	2	1	4	2100	58	1.6	86	97	140	85	1	12	12	120	139	166	141.667	1	1	2	1	2	1	2	1	1	999	2	6.6	4.3	1.6	0.4	0.3	0.1	5.69	16.9	51.1	89.9	29.6	33	13.8	293	9.3	22.6562	0.87234	1	0
127	44	1	2	1	4	1800	60	1.7	75	85	110	70	2	9	9	208	142	188	179.333	1	2	2	2	2	1	2	1	2	1	2	4.5	1.7	1.9	0.6	0.3	0	4.9	16.3	48.7	99.3	33.2	33.4	13.4	189	9.2	20.7612	0.886598	1	0
128	36	1	4	1	3	3470	66	1.6	85	95	124	76	1	12	12	128	140	116	128	1	2	1	999	1	999	2	3	1	999	2	9	6.3	1.7	0.6	0.4	0	5.59	16.8	50.7	90.6	32.1	35.5	13.4	235	7.9	25.7812	0.882979	1	0
131	42	1	4	1	1	10000	78	1.65	79	88	130	90	1	10	10	140	148	191	159.667	1	1	2	2	1	999	2	1	2	1	2	8.2	4	2.9	0.6	0.6	0.1	4.83	15.3	46.6	96.5	31.7	32.9	15.4	282	8.3	28.6501	0.852273	1	0
5	44	2	3	1	1	1500	70	1.5	88	98	120	80	1	12	12	135	132	140	135.667	1	1	1	999	1	999	1	999	1	999	2	7	3	2.6	0.8	0.3	0.1	5.08	15.7	45.6	89.8	30.8	34.4	14.2	247	10.1	31.1111	0.918605	2	0
7	44	2	3	2	3	2000	65	1.75	77	89	120	80	1	9	9	160	148	158	155.333	1	2	2	1	1	999	2	1	2	1	2	4.1	3.6	2.4	0.8	0.3	0	5	15.4	48.5	97	30.8	33.1	13.2	248	9.1	21.2245	0.846939	2	0
9	28	2	4	1	3	3000	48	1.45	82	92	130	80	1	9	9	200	173	200	191	1	1	2	2	2	1	2	1	1	999	1	8.2	4.1	2.3	1	0.3	0.1	5.85	15	45.7	84	28	32.8	16.5	152	11.4	22.83	0.849462	1	0
12	40	2	4	2	1	2500	65	1.6	83	96	120	80	1	7	7	189	133	207	176.333	1	2	1	999	1	999	2	1	2	2	2	5.6	4.2	2.1	1	0.2	0	5.24	16.3	45.1	86.1	31	36	12.8	319	7.7	25.3906	0.864198	2	0
14	56	2	1	1	4	3000	45	1.5	75	88	130	90	1	11	11	195	185	195	191.667	1	1	2	2	2	1	2	1	2	2	2	6.2	3.5	2.3	0.2	0.1	0.1	4.82	14.9	43.9	91.1	30.8	33.8	15.5	398	8.2	20	0.883721	2	0
15	38	2	4	1	3	1500	62	1.7	76	89	120	80	1	9	9	178	157	188	174.333	1	2	2	2	1	999	1	999	2	2	1	7.8	5.6	1	1	0.1	0	4.75	15.3	44.2	92.9	32.1	34.6	12.7	221	9.5	21.4533	0.897959	2	0
45	46	2	4	1	1	3200	58	1.45	78	89	130	80	1	9	9	122	138	148	136	1	2	2	1	1	999	1	999	1	999	2	8	6.2	1.8	0.6	0.4	0	5.54	17.6	50.1	90.5	31.8	35.1	14	183	8.3	27.5862	0.882979	2	0
46	42	2	4	1	3	3600	52	1.5	71	78	130	88	1	11	11	200	140	224	188	1	2	2	2	1	999	2	1	2	1	2	7.9	6.2	1.3	0.3	0.1	0.1	4.78	16.6	47.6	99.6	34.6	34.8	15.9	187	9.3	23.1111	0.921053	2	0
48	50	2	3	1	4	1800	50	1.6	74	88	140	70	1	9	9	130	142	125	132.333	1	2	1	999	1	999	1	999	1	999	2	10.4	6.9	1.7	0.5	0.2	0	5.17	15.5	45.6	88.4	30	33.9	15.6	339	7.3	19.5312	0.894118	2	0
64	50	2	4	1	1	2000	67	1.54	84	94	110	70	1	11	11	190	182	203	191.667	1	2	2	2	2	2	1	999	2	2	1	9.2	5.3	2.7	0.7	0.5	0.1	5.3	17.2	50.7	95.8	32.4	33.9	14.3	270	8.1	28.251	0.928571	2	0
67	50	2	3	2	4	18006	60	1.5	76	88	140	85	1	7	7	108	133	124	121.667	1	1	2	1	2	1	2	1	2	1	2	6.2	1.7	3.5	0.8	0.1	0	4.64	15.3	44	94.8	33.1	34.9	13.4	257	7.5	26.6667	0.885057	1	0
74	42	2	1	1	4	1400	66	1.6	82	95	110	75	2	13	13	131	108	138	125.667	1	2	2	3	2	1	2	1	2	3	2	4	1.74	2	0.5	0.2	0	5.1	16.1	45.5	89.1	31.6	35.5	14.5	252	7.5	25.7812	0.853933	2	0
84	39	2	3	1	4	1200	54	1.6	71	81	128	79	1	8	8	198	110	188	165.333	1	2	2	2	2	1	2	1	2	3	2	6.4	3.5	1.8	0.9	0.2	0	5.28	15.9	45.6	86.4	30.1	34.9	13.3	305	8	21.0937	0.910256	2	0
85	43	2	4	1	4	4870	60	1.6	76	88	123	78	1	10	10	200	192	210	200.667	1	2	2	2	2	1	1	999	2	1	2	7.6	4.3	1.8	0.7	0.6	0.1	5.55	16	46.1	86.5	28.8	34.6	13	300	8.6	23.4375	0.840909	1	0
114	48	2	3	1	4	2800	70	1.5	88	97	140	78	1	10	10	128	140	189	152.333	1	2	2	2	2	1	2	1	2	1	2	8.3	2.8	2.8	0.6	0.5	0.1	5.83	15.9	48.7	83.6	27.3	32.7	14.1	326	9.9	31.1111	0.852273	2	0
133	45	2	1	1	4	1500	80	1.6	82	94	120	80	1	7	7	128	138	162	142.667	1	2	2	2	2	2	2	1	2	3	1	6.5	4.2	1.7	0.5	0	0	5.47	15.7	47.9	87.5	28.6	32.7	13.4	335	8.9	31.25	0.897959	1	0
18	45	2	2	1	4	1500	50	1.5	69	78	110	70	1	10	10	220	240	204	221.333	1	2	2	2	2	1	2	1	2	1	2	4.3	2.3	1.5	0.3	0.1	0	4.35	14.1	40	91.9	32.4	35.3	14.3	283	7.3	22.2222	0.871795	2	0
23	60	2	3	1	4	1500	55	1.4	69	80	120	80	1	10	10	190	200	164	184.667	1	2	2	2	2	1	2	1	2	2	2	7.3	4.6	2.1	0.5	0.1	0	4.35	14.4	41.8	96	33.1	34.5	14.8	200	8.6	28.0612	0.865169	1	0
25	52	2	4	1	2	2500	66	1.56	88	98	110	70	1	10	10	120	153	219	164	1	2	1	999	1	999	1	999	1	999	2	7.4	3.9	1.7	1	0.3	0.1	4.46	14.5	42.3	94.1	27.5	34.1	13.7	243	7.7	27.1203	0.876289	1	0
33	40	2	4	1	3	2800	50	1.5	79	86	120	80	1	7	7	150	240	204	198	1	2	1	999	1	999	1	999	1	999	1	5.9	4.1	1.4	0.3	0	0	4.13	14.3	41.1	99.5	34.6	34.7	12.4	274	7.4	22.2222	0.925	1	0
56	60	2	3	1	4	1200	60	1.6	78	88	110	70	1	10	10	180	140	214	178	1	2	2	2	2	1	1	999	2	1	2	8.5	4.9	2.6	0.9	0.1	0	4.83	14.8	43.4	89.9	30.7	34.2	13.7	270	9.2	23.4375	0.896552	2	0
60	60	2	3	1	4	3400	75	1.6	90	99	130	80	1	9	9	125	169	202	165.333	1	2	2	1	1	999	2	1	2	1	2	6.5	2.9	2.5	0.4	0.1	0.1	4.05	14.1	41.6	100	34.9	34	16	294	8.5	29.2969	0.87234	1	0
21	27	1	3	2	4	1800	50	1.4	69	81	130	80	1	7	7	112	268	170	183.333	1	2	2	1	2	1	1	999	2	2	2	5.6	4.3	1.8	0.7	0.1	0.1	4.25	14.3	41.9	98.6	33.7	34.2	16.5	323	8.8	25.5102	0.873418	2	0
52	55	1	4	1	1	6809	60	1.5	89	96	130	90	1	13	13	200	205	196	200.333	1	2	1	999	1	999	1	999	1	999	2	7.6	4.9	1.9	0.6	0.1	0	4.16	14.5	39.5	95.8	35	36.5	14.2	134	9.2	26.6667	0.897959	1	0
76	39	1	1	1	4	1800	55	1.5	68	77	110	70	1	9	9	108	159	123	130	1	1	2	2	1	999	1	999	1	999	2	5.9	4.3	1.3	0.3	0	0	4.76	14.1	42.4	89	29.5	33.2	13.7	272	8.5	24.4444	0.8625	2	0
77	46	1	4	1	4	1400	48	1.5	69	78	130	80	1	10	10	120	131	115	122	1	1	2	2	1	999	2	2	2	2	2	5.7	2.3	2.8	0.2	0.2	0.1	4.87	14.2	42	86.2	29.1	33.8	13.9	325	8.5	21.3333	0.8875	2	0
78	45	1	4	1	1	4678	67	1.6	79	89	110	75	2	10	10	220	237	180	212.333	1	1	2	2	2	1	2	1	2	2	2	7.4	4.1	2.6	0.5	0.1	0.1	4.6	14.8	42.6	88.4	30.1	33.2	14.8	298	9.8	26.1719	0.897959	2	0
80	41	1	2	1	4	2000	64	1.5	75	86	110	80	2	8	8	160	200	182	180.667	1	1	2	1	1	999	2	1	1	999	2	5.9	4.1	1.5	0.2	0	0.1	4.74	14.1	42.3	89.3	29.8	33.3	13.7	268	8.4	28.4444	0.887755	2	0
91	44	1	4	1	4	2400	60	1.75	79	89	100	70	1	11	11	140	210	125	158.333	1	1	2	3	2	2	2	1	2	1	2	4.2	2	1.8	0.3	0	0	4.81	13.8	41.2	85.5	28.7	33.6	15	216	8.4	19.5918	0.863636	1	0
94	48	1	4	1	2	4500	69	1.55	87	97	130	85	1	11	11	200	170	224	198	1	1	2	1	1	999	2	1	1	999	2	4.3	2.1	1.9	0.3	0	0	4.78	13.8	41	85.7	28.9	33.7	14.9	218	9.1	28.7201	0.851064	1	0
96	43	1	1	2	4	1500	60	1.65	81	92	130	85	1	9	9	140	120	136	132	1	1	2	1	2	2	2	2	1	999	1	9.1	6	2	0.6	0.5	0	4.82	14.4	41	85.1	30	35.2	13.5	271	10.2	22.0386	0.863636	2	0
98	49	1	4	1	2	2000	80	1.65	79	89	135	85	1	9	9	125	130	175	143.333	1	1	2	1	1	999	2	1	2	2	2	10.2	8	3	0.54	0.12	0.17	4.87	14.8	44.3	90.9	30.4	33.4	15.6	329	7.3	29.3848	0.860465	1	0
101	43	1	2	1	4	2200	60	1.68	70	78	128	78	1	9	9	200	182	178	186.667	1	1	2	1	2	1	2	1	2	1	1	8.5	6.22	1.5	0.57	0.12	0.09	4.84	14.6	40.7	84.1	30.1	35.8	16.5	354	6.7	21.2585	0.886076	1	0
120	50	1	3	1	3	1200	68	1.7	81	91	125	80	1	12	12	204	128	162	164.667	1	2	2	2	2	1	2	1	2	1	1	7.2	3.9	2.2	0.8	0.3	0	5.45	13.8	41.5	88	29	33.2	15	307	7.3	23.5294	0.896907	2	0
126	40	1	4	1	3	3578	72	1.8	83	94	112	68	1	11	11	120	142	132	131.333	1	1	2	2	2	1	2	1	2	2	2	6.2	4.3	1.5	0.3	0	0	4.95	14.4	44.2	89.2	29.1	32.6	13.5	312	9.8	22.2222	0.89011	2	0
65	60	2	3	1	4	2300	65	1.55	75	88	120	80	1	13	13	120	140	149	136.333	1	2	2	2	2	1	2	2	2	2	2	6.2	4.4	1.9	0.5	0.4	0	4.23	13.4	39.8	94	31.6	33.6	15.5	305	7.2	27.0552	0.897727	2	0
83	40	2	2	1	4	4600	71	1.5	89	99	130	85	1	11	11	200	250	190	213.333	1	2	2	1	2	1	2	1	2	3	2	4.3	2	1.9	0.3	0	0	4.8	13.8	41	85.5	28.8	33.7	14.8	220	9.1	31.5556	0.876404	1	0
87	56	2	3	1	1	4500	65	1.5	88	98	112	70	2	7	7	126	130	140	132	1	2	2	1	1	999	1	999	2	1	2	4.2	2.8	1.8	0.3	0	0	4.81	13.8	41.2	85.5	28.7	33.6	15	216	8.4	28.8889	0.894737	1	0
119	50	2	1	1	4	3200	67	1.55	85	99	140	79	2	8	8	148	162	173	161	1	2	2	1	2	1	2	2	2	1	2	4.6	2.6	1.2	0.6	0.2	0	3.99	12.4	37.7	94.4	31.2	33	16.6	153	10.3	27.8876	0.88764	2	0
[truncated: 12 more columns]
